# Supplementary material
Source: PubMed Central journal article supplement (PMC5577943)
Supplement: NIHMS856992-supplement-supplement_1.pdf [file NIHMS856992-supplement-supplement_1.pdf]

**TABLE S1** Multiple Regression Model for the Difference in Error-Related Negativity ( $\Delta$ ERN) at the Central Electrode (Cz) as the Dependent Variable and Child Behavior Checklist (CBCL) Syndrome Scales and Age, Accuracy, Obsessive-Compulsive Disorder (OCD), and CBCL Syndrome Scales as Predictors

| Full Model                        | Regression |              |              |              |              |       | Correlation     |               |
|-----------------------------------|------------|--------------|--------------|--------------|--------------|-------|-----------------|---------------|
|                                   | $R^2$      | $\beta$      | $\beta$ (SE) | $t$          | $p$          | $F$   | $r$ (bivariate) | $r$ (partial) |
|                                   | 0.162      |              |              |              | .005         | 2.58  |                 |               |
| Age                               |            | <b>-0.48</b> | <b>0.16</b>  | <b>-3.00</b> | <b>.003</b>  |       | <b>-0.26</b>    | <b>-0.26</b>  |
| Accuracy                          |            | -5.37        | 8.02         | -0.67        | .50          |       | -0.03           | -0.03         |
| OCD                               |            | -1.40        | 1.35         | -1.04        | .30          |       | -0.15           | -0.03         |
| CBCL Anxious/Depressed scale      |            | -0.21        | 0.19         | -1.12        | .26          |       | -0.18           | -0.10         |
| CBCL Withdrawn/Depressed scale    |            | <b>-0.62</b> | <b>0.29</b>  | <b>-2.18</b> | <b>.03</b>   |       | <b>-0.25</b>    | <b>-0.18</b>  |
| CBCL Somatic Complaints scale     |            | 0.20         | 0.23         | 0.88         | .38          |       | -0.13           | -0.07         |
| CBCL Social Problems scale        |            | 0.22         | 0.26         | 0.88         | .38          |       | -0.03           | 0.07          |
| CBCL Thought Problems scale       |            | 0.11         | 0.23         | 0.48         | .63          |       | -0.13           | -0.02         |
| CBCL Attention Problems scale     |            | -0.01        | 0.17         | -0.06        | .20          |       | -0.03           | 0.01          |
| CBCL Rule-Breaking Behavior scale |            | 0.45         | 0.35         | 1.29         | .20          |       | -0.02           | 0.11          |
| CBCL Aggressive Behavior scale    |            | -0.06        | 0.16         | -0.35        | .73          |       | -0.07           | -0.03         |
| Reduced Model <sup>a</sup>        | Regression |              |              |              |              |       | Correlation     |               |
|                                   | $R^2$      | $\beta$      | $\beta$ (SE) | $t$          | $p$          | $F$   | $r$ (bivariate) | $r$ (partial) |
|                                   | 0.126      |              |              |              | <.0001       | 11.22 |                 |               |
| Age                               |            | <b>-0.48</b> | <b>0.14</b>  | <b>-3.30</b> | <b>.0012</b> |       | <b>-0.26</b>    | <b>-0.26</b>  |
| CBCL Withdrawn/Depressed scale    |            | <b>-0.62</b> | <b>0.19</b>  | <b>-3.26</b> | <b>.0014</b> |       | <b>-0.25</b>    | <b>-0.25</b>  |

Note: Boldface data represent significant results. A CBCL was not completed for 1 patient with OCD at the time of collecting event-related potential data. SE = standard error.

<sup>a</sup>After backward stepwise deletion of non-significant variables.

**TABLE S2** Correlation Matrix for Age, Obsessive-Compulsive Disorder (OCD), Child Behavior Checklist (CBCL) Syndrome Scales, Accuracy, and Error-Related Negativity (ERN)

|                               | Age   | OCD   | Anxious/<br>Depressed | Withdrawn/<br>Depressed | Somatic<br>Complaints | Social<br>Problems | Thought<br>Problems | Attention<br>Problems | Rule-<br>Breaking<br>Behavior | Aggressive<br>Behavior | Accuracy | ERN   |
|-------------------------------|-------|-------|-----------------------|-------------------------|-----------------------|--------------------|---------------------|-----------------------|-------------------------------|------------------------|----------|-------|
| Age                           | 1     | -0.02 | -0.14                 | 0.04                    | -0.03                 | -0.18              | -0.14               | -0.22                 | 0.04                          | -0.16                  | 0.13     | -0.12 |
| OCD                           | -0.02 | 1     | 0.65                  | 0.48                    | 0.52                  | 0.52               | 0.70                | 0.45                  | 0.20                          | 0.43                   | -0.21    | -0.20 |
| Anxious/<br>depressed         | -0.14 | 0.65  | 1                     | 0.68                    | 0.67                  | 0.64               | 0.80                | 0.55                  | 0.42                          | 0.64                   | -0.05    | -0.18 |
| Withdrawn/<br>depressed       | 0.04  | 0.48  | 0.68                  | 1                       | 0.60                  | 0.48               | 0.56                | 0.46                  | 0.46                          | 0.49                   | -0.02    | -0.30 |
| Somatic<br>complaints         | -0.03 | 0.52  | 0.67                  | 0.60                    | 1                     | 0.38               | 0.53                | 0.38                  | 0.27                          | 0.42                   | -0.08    | -0.20 |
| Social<br>problems            | -0.18 | 0.49  | 0.64                  | 0.48                    | 0.38                  | 1                  | 0.63                | 0.58                  | 0.46                          | 0.54                   | -0.01    | -0.12 |
| Thought<br>problems           | -0.14 | 0.70  | 0.80                  | 0.56                    | 0.53                  | 0.63               | 1                   | 0.55                  | 0.34                          | 0.53                   | 0.02     | -0.18 |
| Attention<br>problems         | -0.22 | 0.45  | 0.56                  | 0.46                    | 0.38                  | 0.58               | 0.55                | 1                     | 0.52                          | 0.55                   | -0.12    | -0.06 |
| Rule-<br>breaking<br>behavior | 0.04  | 0.20  | 0.42                  | 0.46                    | 0.27                  | 0.46               | 0.34                | 0.52                  | 1                             | 0.60                   | 0.04     | -0.11 |
| Aggressive<br>behavior        | -0.16 | 0.43  | 0.64                  | 0.49                    | 0.42                  | 0.54               | 0.53                | 0.55                  | 0.60                          | 1                      | -0.13    | -0.09 |
| Accuracy                      | 0.13  | -0.21 | -0.05                 | -0.02                   | -0.08                 | -0.01              | 0.02                | -0.12                 | 0.04                          | -0.13                  | 1        | -0.14 |
| ERN                           | -0.12 | -0.20 | -0.18                 | -0.30                   | -0.20                 | -0.12              | -0.18               | -0.06                 | -0.11                         | -0.09                  | -0.14    | 1     |
| ΔERN                          | -0.26 | -0.19 | -0.18                 | -0.25                   | -0.13                 | -0.03              | 0.13                | -0.03                 | -0.02                         | -0.07                  | -0.03    | 0.62  |

*Note: A CBCL was not completed for 1 patient with OCD at the time of collecting event-related potential data. ΔERN = error-related negativity amplitude minus correct response negativity amplitude.*

**TABLE S3** Multiple Linear Regression Model for the Difference in Error-Related Negativity (ΔERN) at the Central Electrode (Cz) With Obsessive-Compulsive Disorder (OCD) Symptom Dimensions and Age and Accuracy as Predictors

|                        | Regression     |              |             |              |            |      | Correlation   |              |
|------------------------|----------------|--------------|-------------|--------------|------------|------|---------------|--------------|
|                        | R <sup>2</sup> | β            | β (SE)      | t            | p          | F    | r (bivariate) | r (partial)  |
| Present symptoms       | 0.097          |              |             |              | .37        | 1.07 |               |              |
| Taboo                  |                | 2.13         | 5.60        | 0.38         | .71        |      | 0.01          | 0.05         |
| Cleaning/contamination |                | 0.22         | 3.03        | 0.07         | .94        |      | 0.02          | 0.01         |
| Doubts                 |                | -4.50        | 5.06        | -0.89        | .38        |      | -0.10         | -0.10        |
| Rituals/superstitions  |                | 2.31         | 5.16        | 0.45         | .66        |      | -0.04         | 0.05         |
| Symmetry/hoarding      |                | -0.46        | 4.13        | -0.11        | .91        |      | -0.08         | -0.01        |
| Age                    |                | <b>-0.48</b> | <b>0.22</b> | <b>-2.13</b> | <b>.04</b> |      | <b>-0.26</b>  | <b>-0.24</b> |
| Accuracy               |                | -10.87       | 9.66        | -1.12        | .26        |      | -0.14         | -0.13        |
| Lifetime symptoms      | 0.122          |              |             |              | .20        | 1.43 |               |              |
| Taboo                  |                | 0.52         | 4.49        | 0.12         | .92        |      | 0.02          | 0.01         |
| Cleaning/contamination |                | -0.63        | 2.69        | -0.23        | .82        |      | -0.03         | -0.03        |
| Doubts                 |                | 1.31         | 4.20        | 0.31         | .76        |      | -0.09         | 0.04         |
| Rituals/superstitions  |                | -3.05        | 4.20        | -0.73        | .47        |      | -0.22         | -0.09        |
| Symmetry/hoarding      |                | -2.86        | 3.75        | -0.76        | .45        |      | -0.22         | -0.09        |
| Age                    |                | -0.41        | 0.22        | -1.88        | .06        |      | -0.26         | -0.22        |
| Accuracy               |                | -10.87       | 9.66        | -1.12        | .26        |      | -0.14         | -0.14        |

*Note: Boldface data represent significant results. SE = standard error.*
